# Supplementary material
Source: PubMed Central journal article supplement (PMC7480275)
Supplement: mmc1.pdf [file mmc1.pdf]

246 **Supplementary Table 1: Ct differences between NSS and RNA samples**  
 247

| <b>Kit (Genes)</b>      | <b>ΔCt: Ct NSS- Ct RNA value</b> |                  |
|-------------------------|----------------------------------|------------------|
|                         | <b>Median (IQR)</b>              |                  |
|                         | <b>SARS-CoV-2</b>                | <b>IC</b>        |
| <b>Roche (RdRp)</b>     | 6,21 (4,03-7,34)                 | 3,55 (2,36-4,40) |
| <b>BGI (ORF)</b>        | 2,70 (0,00-4,29)                 | 3,15 (0,41-6,48) |
| <b>SunYat-Sen (ORF)</b> | 4,15 (2,31-5,22)                 | 4,12 (2,03-6,77) |
| <b>SunYat-Sen (N)</b>   | 4,11 (3,01-5,31)                 | 4,12 (2,03-6,77) |

248
